# Supplementary material for: Up-regulation of β-amyloidogenesis in neuron-like human cells by both 24- and 27-hydroxycholesterol: protective effect of N-acetyl-cysteine
Source: PubMed Central journal article supplement (PMC4326893; doi:10.1111/acel.12206), 2014-02-25

**A** Differentiated SK-N-BE

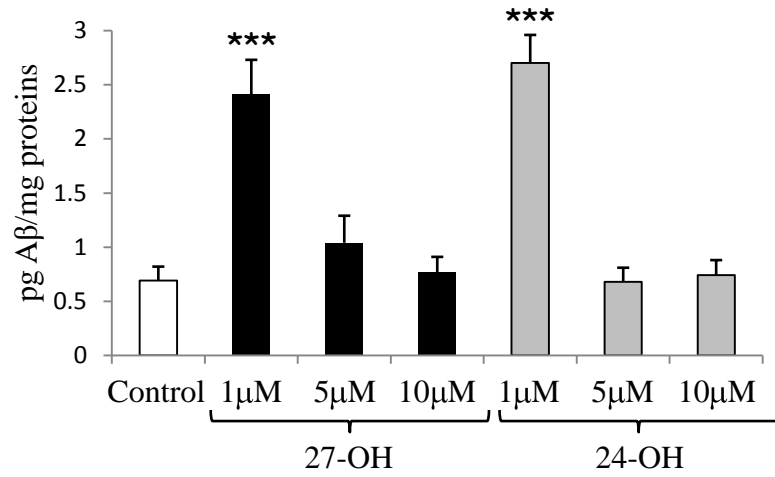

**B** Undifferentiated SK-N-BE

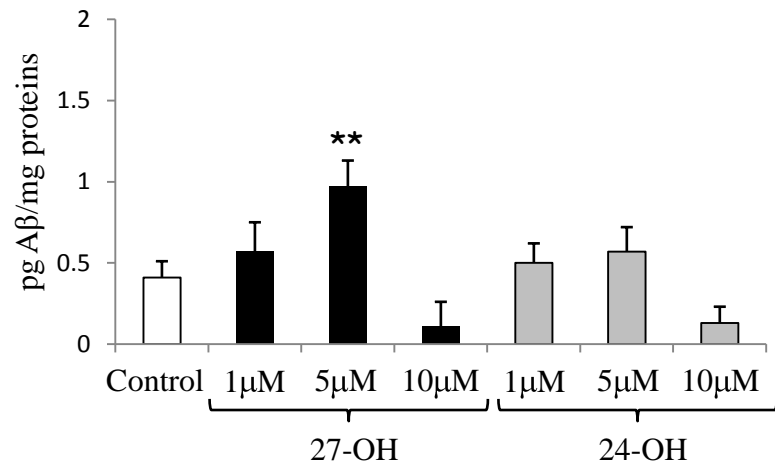

Supplement: acel0013-0561-sd1.pdf [file acel0013-0561-sd1.pdf]
